# Supplementary material for: Aerated Buffalo Slurry Improves Spinach Plant Growth and Mitigates CO2 and N2O Emissions from Soil
Source: MDPI journal article supplement (doi:10.3390/agriculture11080758), 2021-08-10
Supplement: s1 [file s1]

**Table S1.** Metal bioaccumulation factor in root (BF<sub>Root</sub>) and leaves (BF<sub>Leaves</sub>); translocation factor (TF), and concentration index (CI). Data are means (n=5) ± SE.

| Treatment         | Pb                   |                      |                      | Cd                   |                      |                      | Cu                   |                      |                      | Zn                   |                      |                      |                  |
|-------------------|----------------------|----------------------|----------------------|----------------------|----------------------|----------------------|----------------------|----------------------|----------------------|----------------------|----------------------|----------------------|------------------|
|                   | BF <sub>Root</sub>   | BF <sub>Leaves</sub> | TF                   | CI               |
| Ctr               | 1.0±0.0 <sup>a</sup> | 0.8±0.0 <sup>a</sup> | 0.8±0.0 <sup>a</sup> | 2.2±0.5 <sup>a</sup> | 2.5±0.3 <sup>a</sup> | 1.2±0.2 <sup>a</sup> | 0.6±0.1 <sup>a</sup> | 0.2±0.0 <sup>a</sup> | 0.3±0.0 <sup>a</sup> | 1.7±0.1 <sup>a</sup> | 1.2±0.0 <sup>a</sup> | 0.7±0.1 <sup>a</sup> |                  |
| US                | 1.4±0.1 <sup>b</sup> | 1.3±0.0 <sup>b</sup> | 0.9±0.1 <sup>a</sup> | 1.3±0.1 <sup>b</sup> | 2.0±0.2 <sup>a</sup> | 1.5±0.1 <sup>b</sup> | 0.7±0.0 <sup>b</sup> | 0.2±0.0 <sup>b</sup> | 0.3±0.0 <sup>a</sup> | 1.3±0.0 <sup>b</sup> | 1.3±0.1 <sup>a</sup> | 1.0±0.1 <sup>b</sup> | 1.1 <sup>a</sup> |
| AS <sub>24h</sub> | 1.0±0.2 <sup>a</sup> | 0.4±0.0 <sup>c</sup> | 0.4±0.1 <sup>b</sup> | 1.0±0.3 <sup>c</sup> | 1.4±0.2 <sup>c</sup> | 1.2±0.3 <sup>a</sup> | 0.7±0.1 <sup>b</sup> | 0.1±0.0 <sup>c</sup> | 0.2±0.0 <sup>b</sup> | 1.0±0.2 <sup>c</sup> | 0.9±0.0 <sup>b</sup> | 1.0±0.2 <sup>b</sup> | 0.7 <sup>b</sup> |

Different letters denote statistically significant difference.  $p < 0.05$ .
